# Supplementary material for: The binuclear dual emitter [Br(CO)3Re(P⋯N)(N⋯P)Re(CO)3Br] (P⋯N): 3-chloro-6-(4-diphenylphosphinyl)butoxypyridazine, a new bridging P,N-bidentate ligand resulting from the ring opening of tetrahydrofuran
Source: Royal Society of Chemistry journal article supplement (doi:10.1039/c6dt04158b), 2016-12-17
Supplement: c6dt04158b1.pdf [file c6dt04158b1.pdf]

**Electronic Supplementary Information**

**“THE BINUCLEAR DUAL EMITTER [Br(CO)<sub>3</sub>Re(P...N)(N...P)Re(CO)<sub>3</sub>Br] (P...N): 3-CHLORO-6-(4-DIPHENYLPHOSPHINYL)BUTHOXYPYRIDA-ZINE), A NEW BRIDGING *P,N*-BIDENTATE LIGAND RESULTING FROM THE RING OPENING OF TETRAHYDROFURAN”**

by the authors:

Marianela Saldías, Jorge Manzur, Rodrigo E. Palacios, María L. Gómez, Julio De La Fuente, Germán Günther,  
Nancy Pizarro and Andrés Vega

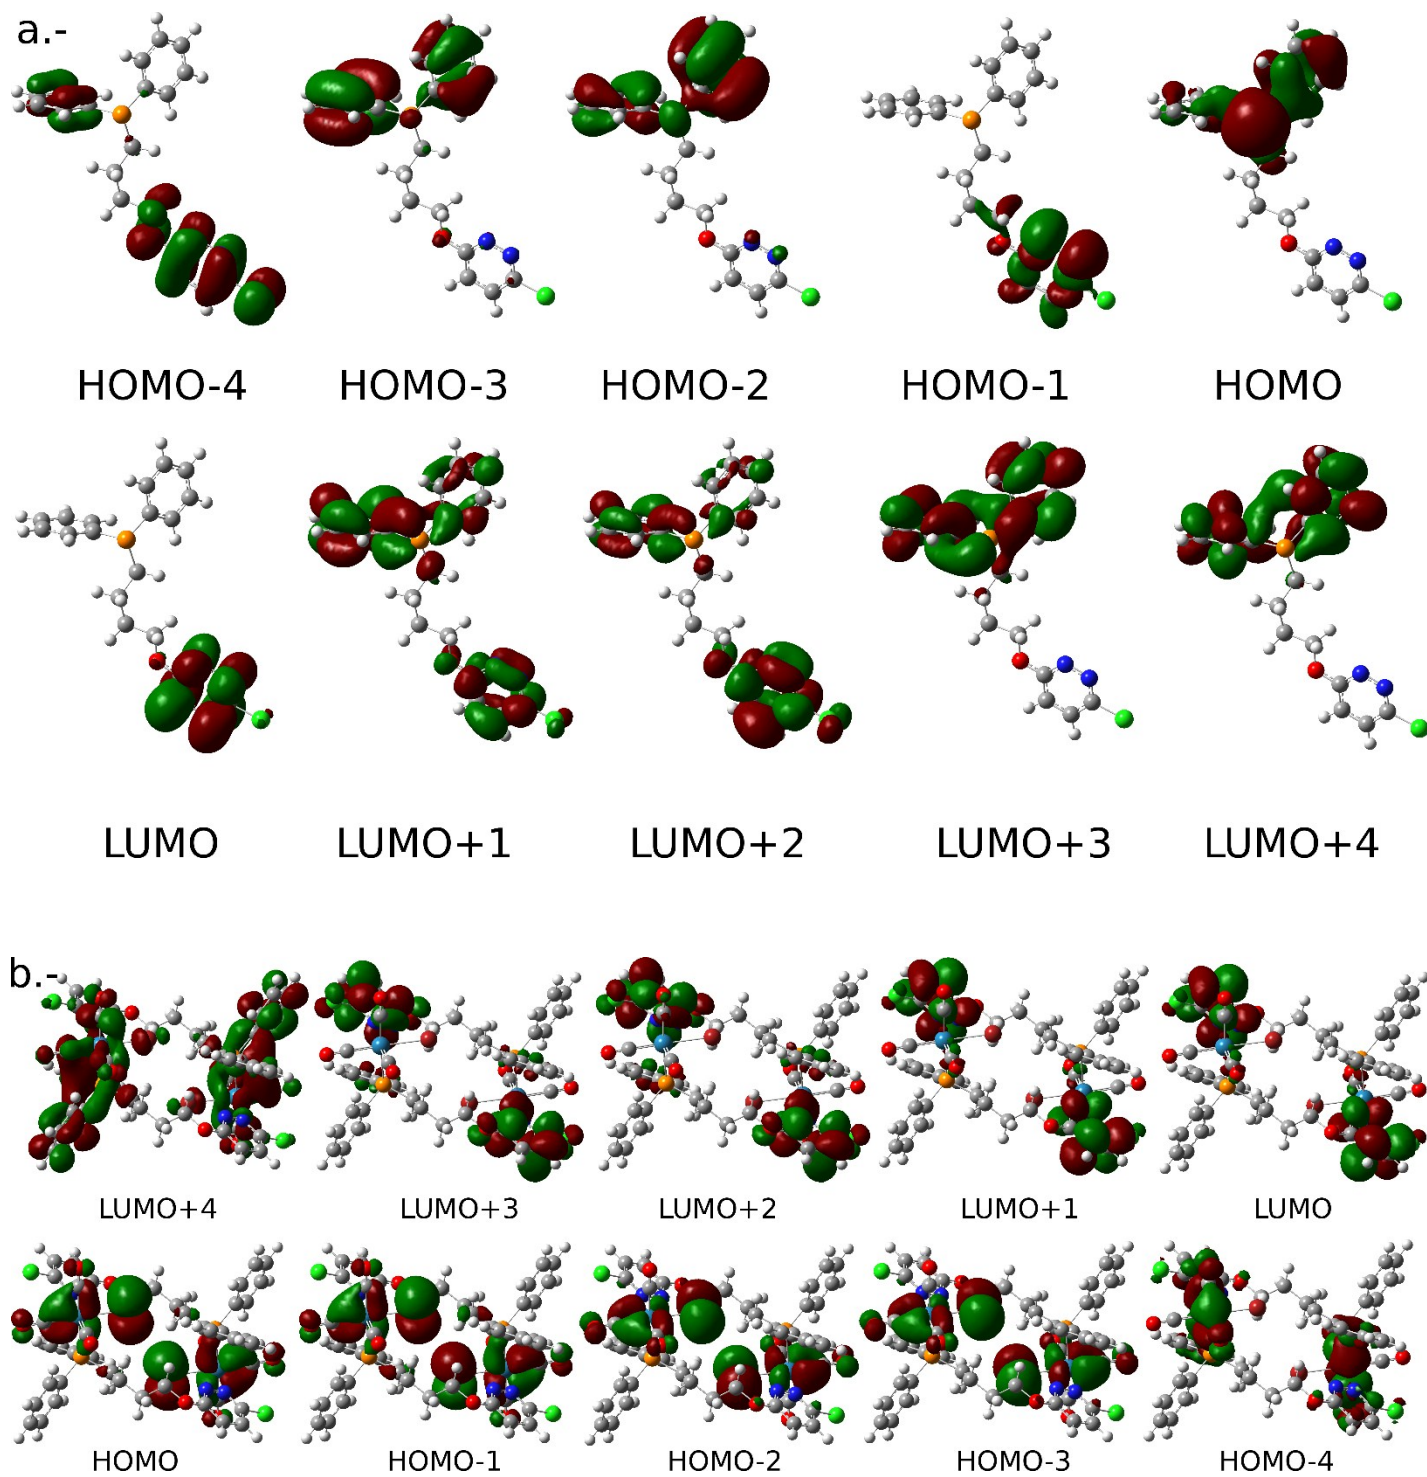

**Figure S1.** DFT computed frontier and near frontier orbitals for (a.-) P...N and (b.-) BrRe(P...N)(N...P)ReBr.

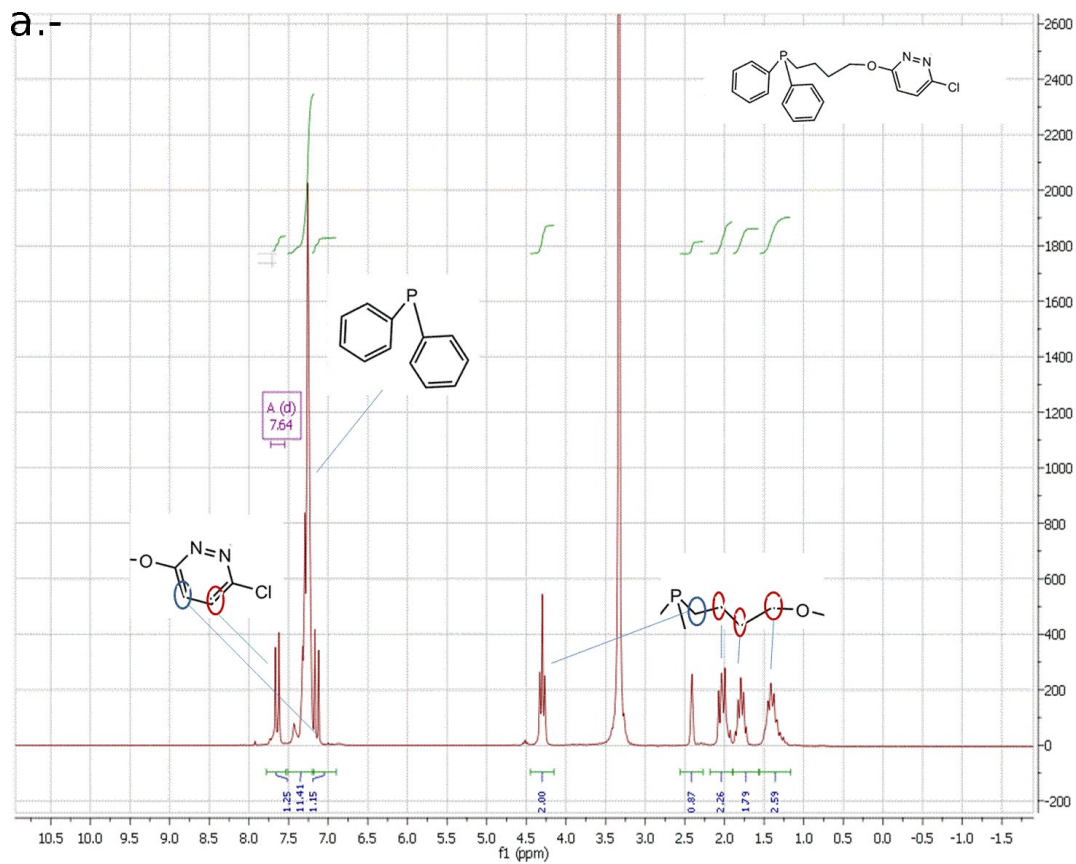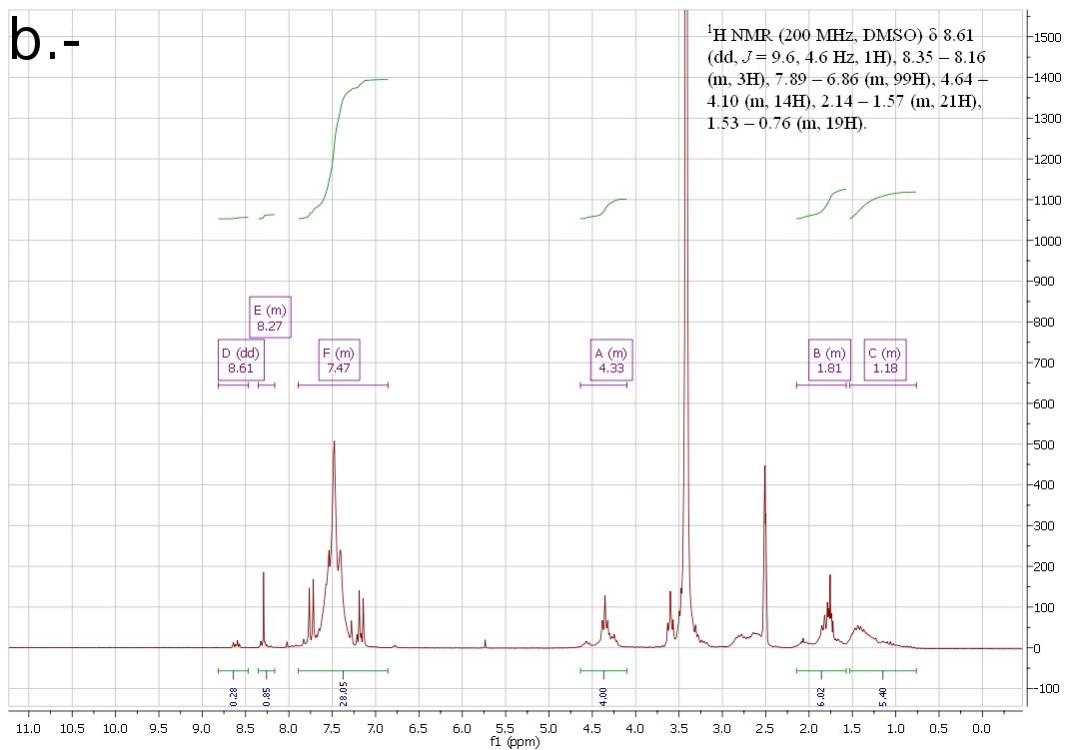

Figure S2.  $^1\text{H}$ NMR spectra determined for (a.-) P...N and (b.-) BrRe(P...N)(N...P)ReBr.

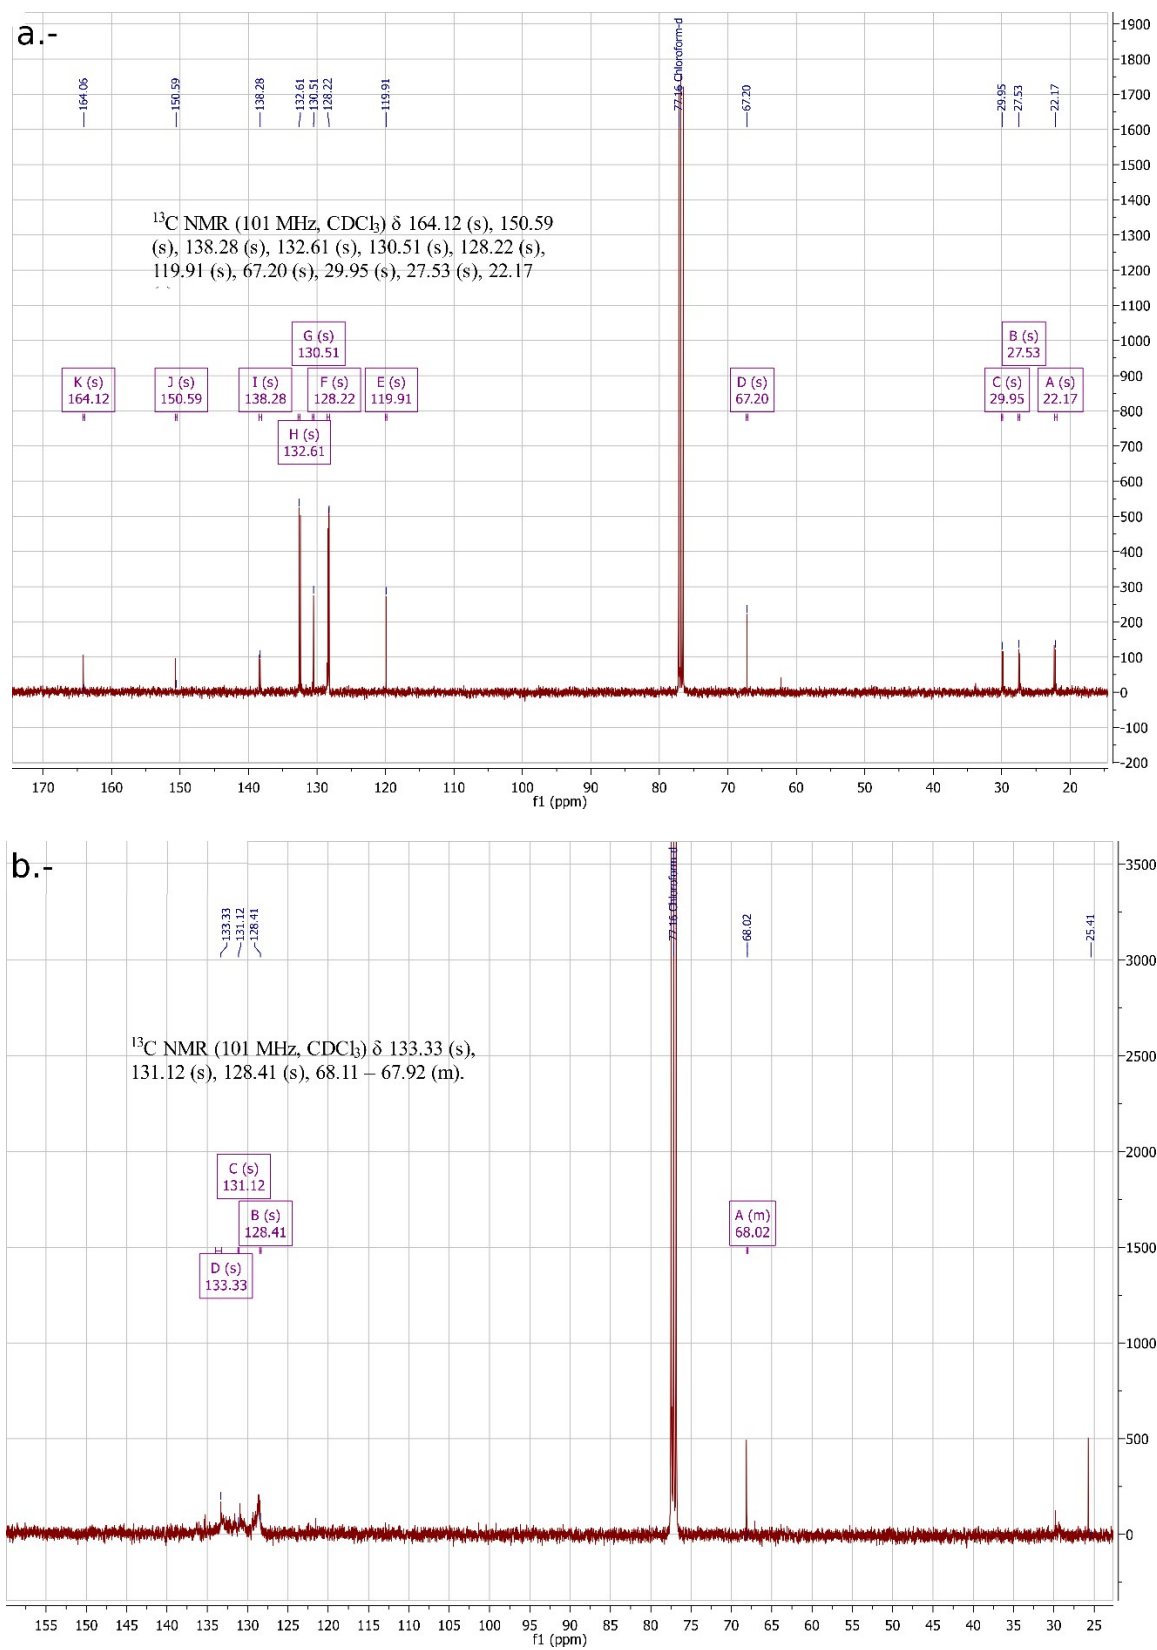

**Figure S3.**  $^{13}\text{C}$ NMR spectra determined for (a.-)  $\text{P}\dots\text{N}$  and (b.-)  $\text{BrRe}(\text{P}\dots\text{N})(\text{N}\dots\text{P})\text{ReBr}$ .

**Table S1.** Crystal data and structure refinement [BrRe(P...N)(N...P)ReBr] · (CHCl<sub>3</sub>).

|                                           |                                              |
|-------------------------------------------|----------------------------------------------|
| <b>FW/uma</b>                             | 3121.49                                      |
| <b>Crystal System</b>                     | Monoclinic                                   |
| <b>Space Group</b>                        | <i>P2<sub>1</sub>/n</i>                      |
| <b>a (Å)</b>                              | 14.610(2)                                    |
| <b>b (Å)</b>                              | 16.549(3)                                    |
| <b>c (Å)</b>                              | 14.945(2)                                    |
| <b>β (°)</b>                              | 106.963(2)                                   |
| <b>V (Å<sup>3</sup>)</b>                  | 3456.2(9)                                    |
| <b>Z</b>                                  | 1                                            |
| <b>d (g cm<sup>-3</sup>)</b>              | 1.501                                        |
| <b>μ (mm<sup>-1</sup>)</b>                | 4.94                                         |
| <b>F000</b>                               | 1499                                         |
| <b>θ range</b>                            | 1.72 to 26.00                                |
| <b>hkl range</b>                          | -18 ≤ h ≤ 18<br>-20 ≤ k ≤ 20<br>-18 ≤ l ≤ 18 |
| <b>N<sub>totr</sub> N<sub>uniq</sub></b>  | 25442, 6779(0.157),                          |
| <b>(R<sub>int</sub>), N<sub>obs</sub></b> | 3733                                         |
| <b>Refinement Parameters</b>              | 379                                          |
| <b>GOF</b>                                | 1.00                                         |
| <b>R1, wR2 (obs)</b>                      | 0.064, 0.169                                 |
| <b>Max. and min Δρ</b>                    | 0.86, -1.17                                  |

**Table S2.** Bond distances (Å) for **BrRe(P...N)(N...P)ReBr**, **[BrRe(P...N)(N...P)ReBr]<sup>+</sup>** and **[BrRe(P...N)(N...P)ReBr]<sup>-</sup>** as determined from crystallographic data and/or computed from DFT.

| Distance  | BrRe(P...N)(N...P)ReBr |           |           | [BrRe(P...N)(N...P)ReBr] <sup>+</sup> | [BrRe(P...N)(N...P)ReBr] <sup>-</sup> |
|-----------|------------------------|-----------|-----------|---------------------------------------|---------------------------------------|
|           | X-rays                 | DFT       |           | DFT                                   | DFT                                   |
|           |                        | Gas Phase | PCM = DCM | Gas Phase                             | Gas Phase                             |
| Re1—Br1   | 2.6442(13)             | 2.708     | 2.720     | 2.623                                 | 2.724                                 |
| Re1—N1    | 2.213(10)              | 2.325     | 2.319     | 2.320                                 | 2.288                                 |
| Re1—P1    | 2.491(3)               | 2.568     | 2.579     | 2.583                                 | 2.574                                 |
| Re1—C17   | 1.865(11)              | 1.918     | 1.916     | 1.925                                 | 1.918                                 |
| Re1—C18   | 1.996(19)              | 1.950     | 1.945     | 1.973                                 | 1.944                                 |
| Re1—C19   | 1.858(13)              | 1.912     | 1.908     | 1.938                                 | 1.907                                 |
| Re1...Re1 | 9.1467(14)             | 9.466     | 9.684     | 9.509                                 | 9.564                                 |
